# Supplementary material
Source: PubMed Central journal article supplement (PMC7856294)
Supplement: NIHMS1655690-supplement-1.pdf [file NIHMS1655690-supplement-1.pdf]

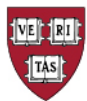

**HARVARD**

Human Research Protection Program

Harvard T.H. Chan School of Public Health  
Office of Human Research Administration  
90 Smith Street, 3rd Floor  
Boston, MA 02120  
Federalwide Assurance FWA00002642

### **Notification of Continuing Review Approval**

May 2, 2019

Gary Adamkiewicz  
gadamkie@hsph.harvard.edu

**Protocol Title:** Exposure Disparities Related to Resident Behavior and Housing Characteristics  
**Principal Investigator:** Gary Adamkiewicz  
**Protocol #:** IRB15-1756  
**Submission #:** CR15-1756-04  
**Funding Source:** NIH/NIMHD- 5P50MD010428-04REVISED (Active); Environmental Protection Agency- 83615601 (Active)  
**Review Date:** 5/2/2019  
**CR Effective Date:** 6/1/2019  
**Expiration Date:** 5/31/2020  
**IRB Review Type:** Expedited  
**IRB Review Action:** Approved

The Institutional Review Board (IRB) of the Harvard T.H. Chan School of Public Health has approved this Continuing Review. **Please note that the approval for this protocol will lapse on 5/31/2020.**

This approval includes the following:

- Continuing Review Application, CR15-1756-04
  - Summary of Study Progress\_05-02-19.doc
  - CRESSH\_Y4\_RPPR.pdf
  - EPA Annual Report\_Web Summary\_Year4\_Final.pdf
- IRB Protocol: ExposureDisparities\_Research-Protocol\_clean\_08-29-18.doc (20)
- Consent Form: ExposureDisparities\_Consent-Form\_air quality\_clean\_04-19-18.pdf (Version 5/04-19-18)
- Consent Form: ExposureDisparities\_ConsentForm\_sleep2\_clean\_04-19-18.pdf (Version 5/04-19-18)
- Consent Form: ExposureDisparities\_ConsentForm\_sleep1\_clean\_4-19-18.pdf (Version 6/04-19-18)
- Recruitment Materials: ExposureDisparities\_ScreeningQuestionnaire\_clean\_07-30-18.pdf (Version 4/07-30-18)



- Recruitment Materials: ExposureDisparities\_ Interested Resident Contact Information\_ 7-6-17.pdf (Version 1/07-06-17)
- Recruitment Materials: ExposureDisparities\_ Recruitment Email\_ 08-07-17.pdf (Version 1/08-14-17)
- Recruitment Materials: ExposureDisparities\_ FAQs\_ clean\_ 04-19-18.pdf (Version 3/04-19-18)
- Recruitment Materials: ExposureDisparities\_ ParticipantPostcard\_ clean\_ 02-02-17.pdf (Version 2/02-02-17)
- Recruitment Materials: ExposureDisparities\_ Social Media Recruitment Text\_ clean\_ 08-07-17.pdf (Version 2/08-14-17)
- Recruitment Materials: ExposureDisparities\_ RecruitmentScript\_ clean\_ 03-10-17.pdf (Version 4/03-10-17)
- Recruitment Materials: ExposureDisparities\_ RecruitmentFlyer\_ clean\_ 06-28-17.pdf (Version 6/06-28-17)
- Other: ExposureDisparities\_ Consent Language for community meeting\_ clean\_ 08-07-18.docx (Version 2/08-07-18)
- Study Instrument/Tools: ExposureDisparities\_ Follow-up Questionnaire (Dorchester)\_ tracked changes\_ 12-18-17.pdf (Version 3/12-18-17)
- Study Instrument/Tools: ExposureDisparities\_ Sampling Pick-up Questionnaire\_ clean\_ 4-26-16.pdf (Version 2/04-26-16)
- Study Instrument/Tools: ExposureDisparities\_ Follow-up Respondent booklet (Dor)\_ tracked changes\_ 12-18-17.pdf (Version 1/12-18-17)
- Study Instrument/Tools: ExposureDisparities\_ BaselineQuestionnaire (Dorchester)\_ clean\_ 06-28-17.pdf (Version 1/06-28-17)
- Study Instrument/Tools: ExposureDisparities\_ Study Visual Inspection Tool\_ clean\_ 7-29-16.pdf (Version 4/07-29-16)
- Study Instrument/Tools: ExposureDisparities\_ Sleep Diary2\_ clean\_ 08-31-17.pdf (Version 1/08-31-17)
- Study Instrument/Tools: ExposureDisparities\_ BaselineQuestionnaire\_ clean\_ 11-3-16.pdf (Version 5/11-3-16)
- Study Instrument/Tools: ExposureDisparities\_ Sleep Diary\_ 02-02-17.pdf (Version 1/02-03-17)
- Study Instrument/Tools: ExposureDisparities\_ Follow-up Questionnaire (Dorchester)\_ clean\_ 12-18-17.pdf (Version 3/12-18-17)
- Study Instrument/Tools: ExposureDisparities\_ Bedroom Schematic with key\_ clean\_ 11-03-17.pdf (Version 2/11-03-17)
- Study Instrument/Tools: Exposure Disparities\_ End of Meeting Discussion Guide\_ 7-31-18.pdf (Version 1/07-31-18)
- Study Instrument/Tools: ExposureDisparities\_ Follow-up Respondent booklet (Dor)\_ clean\_ 12-18-17.pdf (Version 1/12-18-17)
- Study Instrument/Tools: ExposureDisparities\_ Follow-up Study Visual Inspection Tool\_ 12-19-16.pdf (Version 1/12-19-16)
- Study Instrument/Tools: ExposureDisparities\_ Sleep Environmental Audit\_ clean\_ 11-03-17.pdf (Version 3/11-03-17)

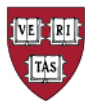

Additionally, the IRB has reviewed the following documents:

- Ancillary Approvals/Permissions: Catalyst Reliance Document\_FW\_ID 2836\_Johnson\_Determination of Single IRB Review of Multi-site Research.pdf (Version 1/02-02-17)
- Other: SMART IRB Adamkiewicz\_1017\_Determination Letter.pdf (0.01)
- Individual Investigator Agreement (IIA): IIA for John Walkey and Rosie Bongiovanni - SIGNED.pdf (0.01)
- IRB Authorization Agreement (IAA) Request: IAA HSPH IRB15-1756 BUMC H-35417\_8-3-2016.pdf (0.01)
- Other: Level 3 worksheet approval email\_7-13-17.pdf (0.01)
- Other: HSPH\_level\_3\_worsheet IRB Protocol Number 15-1756\_approved by IT\_7-13-17.xls (1)
- Other: NIH K Research Strategy\_D.Johnson.pdf (0.01)
- Other: K01 sleep study DSM Plan\_clean\_07-05-17.docx (1)
- Other: K01 sleep study DSMB\_06-28-17.docx (1)
- Other: ExposureDisparities\_Sleep Clinic List\_07-05-17.docx (Version1/07-05-17)
- Other: ExposureDisparities\_Sleep Env Audit respondent booklet\_clean\_06-28-17.docx (Version 2/06-28-17)
- Other: ED\_Follow-up letter for results questionnaire\_08-28-18.docx (Version 1/08-28-18)
- Other: ExposureDisparities\_Daily Activity Log\_clean\_7-29-16.docx (Version 2/07-29-16)
- Other: ExposureDisparities\_Respondent booklet\_clean\_12-19-16.docx (Version 4/12-19-16)
- Other: K01 sleep study Recruitment & Retention\_clean\_07-5-17.docx (1)
- Other: ExposureDisparities HOME Report Back Template\_6-15-18\_Final.pub (Version2/7-30-18)
- Other: ExposureDisparities\_Feedback Letter\_clean\_06-28-17.doc (3/06-28-17)
- Other: ExposureDisparities\_Baseline Q (Dor) Respondent booklet\_clean\_06-28-17.docx (Version 1/06-28-17)
- Other: ExposureDisparities\_GPS Participant Guidelines\_6-28-16.docx (Version1/6-28-16)
- Other: Philips Spectrum Actigraph\_Terms of Service.pdf (Version1/02-07-17)
- Other: ExposureDisparities\_Activity Participant Instructions\_clean\_06-28-17.doc (Version 2/06-28-17)
- Other: Exposure Disparities\_Report Back Evaluation Voicemail Script\_Eng and Span\_7-31-18.docx (Version 1/07-31-18)
- Other: ExposureDisparities\_SaveTheDatePostcard\_06-14-18\_English.docx (1/06-14-18)
- Other: ExposreDisparities\_Dorchester Resource Guide\_clean\_04-04-18.docx (Version 2/4-04-18)
- Other: ExposureDisparities\_Healthy Home tip sheet\_4-26-16.docx (Version 1/04-26-16)
- Other: Exposure Disparities\_Report Back Community Meeting Agenda Template\_8-01-18.docx (Version 1/08-01-18)



- Other: ExposureDisparities\_Chelsea Resource Packet\_clean\_06-12-17.docx (4)
- Translation Attestation Form: Translation Attestation\_6-29-2017.pdf (Version 7/06-29-17)

The IRB is in receipt of the following documents:

- Foreign Language Documents:
  - ExposureDisparities\_Follow-up Questionnaire (Dor)\_Spanish\_clean\_12-18-17.pdf (Version 1/12-18-17)
  - ExposureDisparities\_Chelsea Resource Packet\_Spanish\_clean\_06-12-17.pdf (3)
  - ExposureDisparities\_BaselineQuestionnaire\_Spanish\_clean\_11-3-16.pdf (Version 2/11-3-16)
  - ExposureDisparities\_RecruitmentFlyer\_Spanish\_clean\_06-28-17.pdf (Version 3/06-28-17)
  - ExposureDisparities\_RecruitmentScript\_Spanish\_06-28-17.pdf (Version 1/06-28-17)
  - ExposureDisparities\_Feedback Letter\_Spanish\_06-28-17.pdf (Version 1/06-28-17)
  - ExposureDisparities\_ScreeningQuestionnaire\_Spanish\_clean\_7-30-18.pdf (Version 3/07-30-18)
  - ExposureDisparities\_Consent Form\_air quality\_clean\_Spanish\_06-12-18.pdf (Version 4/06-12-18)
  - Vietnamese Study Instruments\_12-19-17.pdf (Version 3/12-18-17)
  - Exposure Disparities\_Report Back Community Meeting Agenda Template\_Spanish\_8-6-18.pdf (Version 1/08-06-18)
  - ExposureDisparities\_Sleep Clinic List\_Spanish\_09-18-17.pdf (Version 1/09-18-17)
  - ExposureDisparities\_Baseline Q (Dor) Respondent booklet\_Spanish\_clean\_06-28-17.pdf (Version 1/06-28-17)
  - ExposureDisparities\_ParticipantPostcard\_Spanish\_02-02-17.pdf (Version 2/02-02-17)
  - ExposureDisparities\_Sleep Environmental Audit\_Spanish\_11-03-17.pdf (2)
  - ExposureDisparities\_Activity Participant Instructions\_Spanish\_06-28-17.pdf (Version 1/06-28-17)
  - ExposureDisparities\_Dorchester Resource Guide\_VI\_9-18-17.pdf (Version 1/09-18-17)
  - ExposureDisparities\_Sampling Pick-up Questionnaire\_Spanish\_8-17-16.pdf (Version 1/08-17-16)
  - ExposureDisparities\_ConsentForm\_sleep1\_clean\_Spanish\_06-12-18.pdf (Version 4/06-12-18)
  - ExposureDisparities\_Respondent booklet\_Spanish\_12-19-16.pdf (Version 2/12-19-16)
  - ExposureDisparities\_Sleep Diary2\_Spanish\_11-03-17.pdf (Version 1/11-03-17)
  - ExposureDisparities\_DorchesterResourceGuide\_Spanish\_clean\_06-12-18.pdf (Version 2/06-12-18)

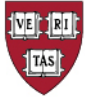

- Exposure Disparities\_End of Meeting Discussion Guide\_Spanish\_8-6-18.pdf (Version 1/08-06-18)
- ExposureDisparities\_SaveTheDatePostcard\_06-14-18\_Spanish.pdf (1/06-14-18)
- Vietnamese Consent & Recruitment Materials\_11-03-17.pdf (Version 3/11-03-17)
- ExposureDisparities\_Daily Activity Log\_Spanish\_8-17-16.pdf (Version 1/08-17-16)
- ExposureDisparities\_Sleep Diary\_Spanish\_06-28-17.pdf (Version 1/06-28-17)
- ExposureDisparities\_FAQ\_clean\_Spanish\_06-12-18.pdf (Version2/06-12-18)
- ExposureDisparities\_Baseline Questionnaire (Dorchester)\_Spanish\_clean\_06-28-17.pdf (Version 1/06-28-17)
- ExposureDisparities\_Follow-up Respondent booklet (Dor)\_Spanish\_clean\_12-18-17.pdf (Version 2/12-18-17)
- ExposureDisparities\_ConsentForm\_sleep2\_Spanish\_clean\_06-12-18.pdf (Version 3/06-12-18)
- ExposureDisparities\_Healthy Home tip sheet\_Spanish\_6-12-17.pdf (1)
- ExposureDisparities\_Consent Language for community meeting\_Spanish\_clean\_08-07-18.pdf (Version 2/08-07-18)
- ED\_Follow-up letter for results questionnaire\_Spanish\_08-28-18.pdf (Version 1/08-28-18)
- ExposureDisparities\_GPS Participant Guidelines\_Spanish\_11-3-16.pdf (Version 1/11-3-16)
- ExposureDisparities\_RecruitmentScript\_Spanish\_clean\_02-02-17.pdf (Version 02-02-17)
- ExposureDisparities\_Sleep Env Audit respondent booklet\_Spanish\_06-28-17.pdf (Version 1/06-28-17)

The IRB made the following determinations:

- Risk Determination: No greater than minimal risk
- Research Information Security Level: The research is classified, using Harvard's Data Security Policy, as Level 3 Data.

If you have any questions, please contact me at 617-432-2160 or [acastro@hsph.harvard.edu](mailto:acastro@hsph.harvard.edu).

Sincerely,

Alma Castro, MA, CIP  
IRB Review Specialist
