# Supplementary material
Source: PubMed Central journal article supplement (PMC7856294)
Supplement: NIHMS1655690-supplement-2.pdf [file NIHMS1655690-supplement-2.pdf]

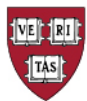

**HARVARD**

Human Research Protection Program

Harvard T.H. Chan School of Public Health  
Office of Human Research Administration  
90 Smith Street, 3rd Floor  
Boston, MA 02120

### **Notification of Initial Study Approval**

June 1, 2015

Gary Adamkiewicz  
gadamkie@hsph.harvard.edu

**Protocol Title:** Exposure Disparities Related to Resident Behavior and Housing Characteristics  
**Protocol #:** IRB15-1756  
**Funding Source:** None  
**IRB Review Date:** 6/1/2015  
**Effective Date:** 6/1/2015  
**Expiration Date:** 5/31/2016  
**IRB Review Type:** Expedited  
**IRB Review Action:** Approved

Dear Gary Adamkiewicz:

On 6/1/2015, after review of your Initial Study, the Institutional Review Board (IRB) of the Harvard T.H. Chan School of Public Health has approved the above-referenced submission. **Please note that the approval for this protocol will lapse on 5/31/2016.**

This approval includes the following:

- ExposureDisparities\_RecruitmentLetter\_05-04-15.docx (Recruitment Materials/Advertisements) version: Version 1/05-04-15
- ExposureDisparities\_RecruitmentFlyer\_clean\_05-15-15.docx (Recruitment Materials/Advertisements) version: Version 2/05-15-15
- ExposureDisparities\_RecruitmentFlyer\_trackedchanges\_05-15-15.docx (Recruitment Materials/Advertisements) version: Version 2/05-15-15
- ExposureDisparities\_Consent-Form\_05-04-15.doc (Consent Materials) version: Version 1/05-04-15
- ExposureDisparities\_Research-Protocol\_clean\_05-15-15.doc (Protocol Documents) version: Version 2/05-15-15
- ExposureDisparities\_Sampling Pick-up Questionnaire\_05-04-15.docx (Study Instrument/Tools) version: Version 1/05-04-15
- ExposureDisparities\_Study Visual Inspection Tool\_05-04-15.docx (Study Instrument/Tools) version: Version 1/05-04-15
- ExposureDisparities\_TimeActivity\_05-04-15.docx (Study Instrument/Tools) version: Version 1/05-04-15

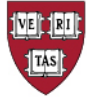

**HARVARD**

Human Research Protection Program

- ExposureDisparities\_BaselineQuestionnaire\_05-04-15.docx (Study Instrument/Tools)  
version: Version 1/05-04-15

Copies of the locally-approved translated versions *or a status update* must be submitted to the IRB within 45 days of this notification letter.

The IRB made the following determinations:

- Risk Determination: No greater than minimal risk
- Research Information Security Level: The research is classified, using Harvard's Data Security Policy, as Level 2 Data.

The IRB requests the following:

- Please submit the foreign language materials and a corresponding Translation Attestation Form prior to using them in the field.

Please contact me at 617-432-2143 or [phryvnia@hsph.harvard.edu](mailto:phryvnia@hsph.harvard.edu) if you have any questions.

Sincerely,

Paul Hryvniak  
IRB Review Specialist

cc: Marty Alvarez-Reeves
